# Supplementary material for: Using VBIM Technique to Discover ARMC4/ODAD2 as a Novel Negative Regulator of NF-κB and a New Tumor Suppressor in Colorectal Cancer
Source: MDPI journal article supplement (doi:10.3390/ijms23052732), 2022-03-01
Supplement: s1 [file s1]

## Supplementary Information

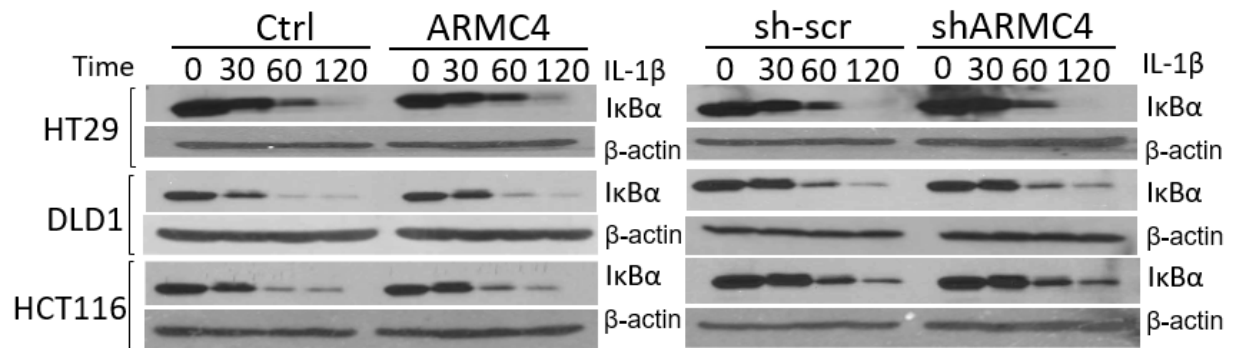

**Supplementary Figure S1. IκBα degradation is similar in ARMC4 knockdown, overexpression, and control lines.** Western Blot, showing IκBα expression is similar in CRC cell lines HT29, HCT116 and DLD1 in overexpression, knockdown and shscramble lines.

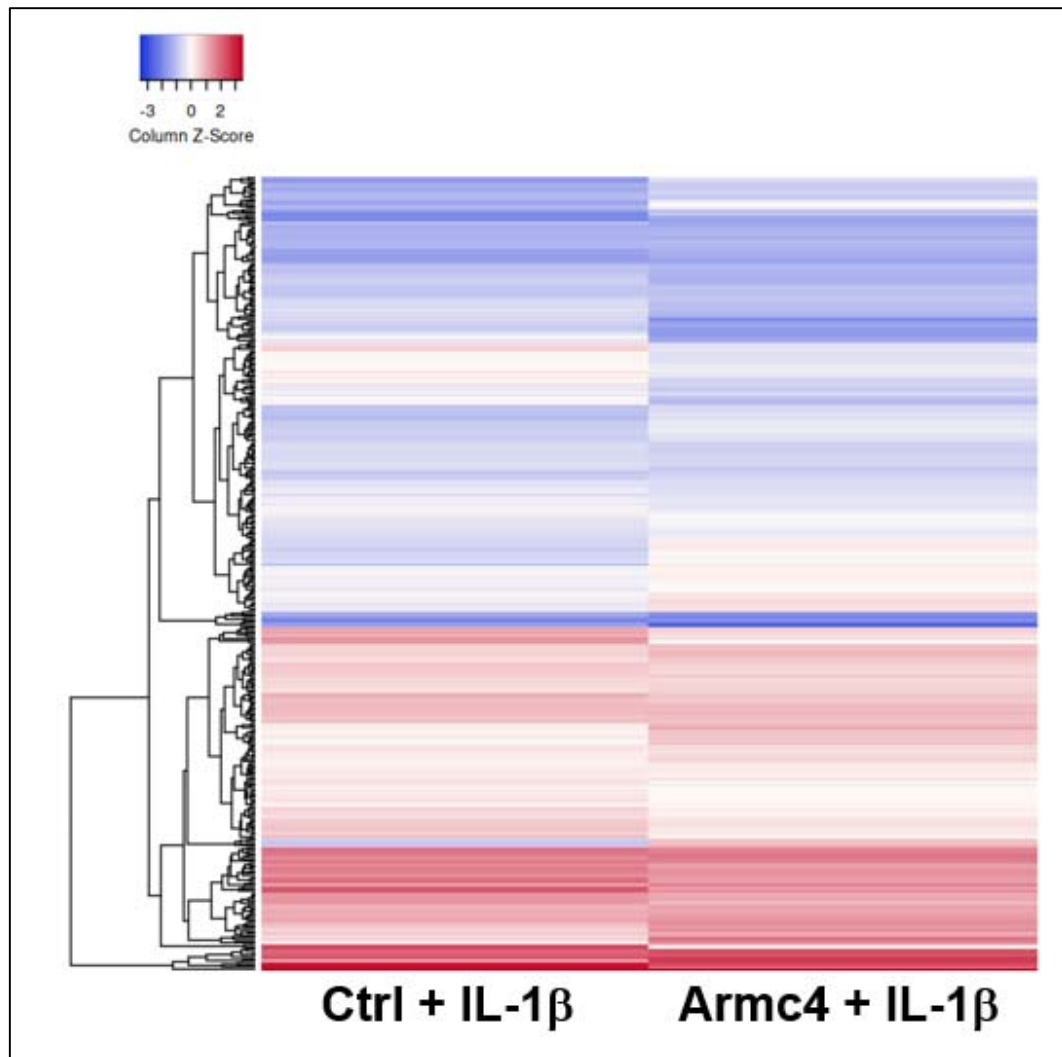

**Supplementary Figure S2. Heatmap, with normalized expression data (log transformed FPKM) for NF- $\kappa$ B-inducible genes (398 genes, based on Ctrl+IL-1 $\beta$  vs. Ctrl  $\geq$  6). Genes were clustered using average linkage method. Software used: <http://www.heatmapper.ca/expression/>**

| Comparison              | Statistical significance |
|-------------------------|--------------------------|
| Normal-vs-Stage1        | 4.518400E-01             |
| <b>Normal-vs-Stage2</b> | <b>2.060500E-02</b>      |
| Normal-vs-Stage3        | 1.992440E-01             |
| Normal-vs-Stage4        | 2.579600E-01             |
| Stage1-vs-Stage2        | 9.704100E-02             |
| Stage1-vs-Stage3        | 6.477400E-01             |
| Stage1-vs-Stage4        | 6.833600E-01             |
| <b>Stage2-vs-Stage3</b> | <b>4.256000E-02</b>      |
| Stage2-vs-Stage4        | 2.362200E-01             |
| Stage3-vs-Stage4        | 9.602800E-01             |

**Supplementary Figure S3. Statistical analysis of Figure 7B.** Staging comparisons versus normal and between stages. Statistics provided on <http://ualcan.path.uab.edu/cgi-bin/TCGAExResultNew2.pl?genenam=ARMC4&ctype=COAD>.
